# Supplementary material
Source: Springer Nature journal article supplement (https://www.springermedizin.de/resource/supplementary/12876_2008_429_MOESM3_ESM.pdf/9436990)

**SVR (n=39)**

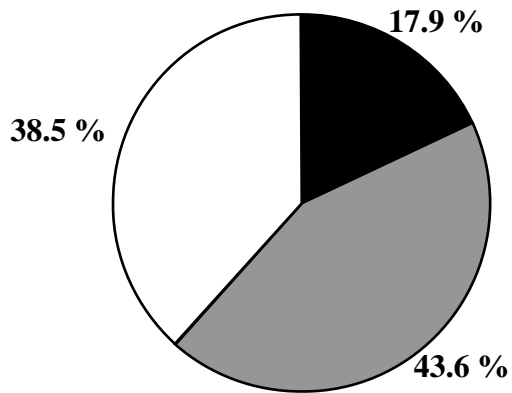

**by TaqMan**

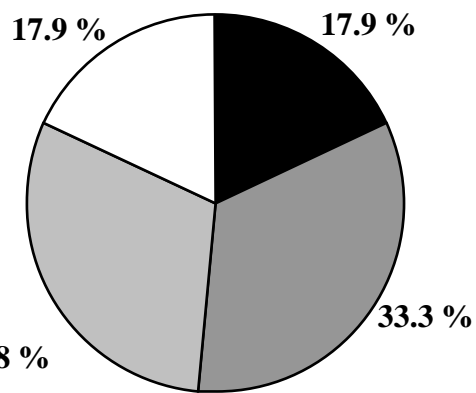

**by qualitative Amplicor**

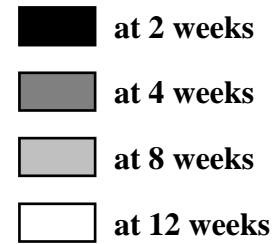

**Non-SVR (n=41)**

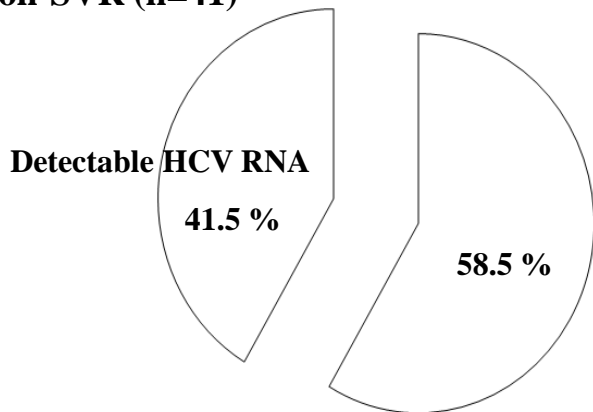

**by TaqMan**

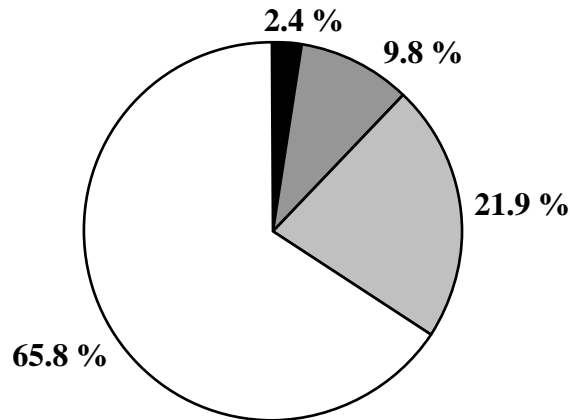

**by qualitative Amplicor**

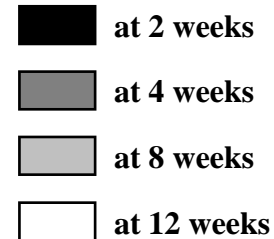

Supplement: MOESM3 [file 9436990]
